# Supplementary material for: Induced Pluripotent Stem Cell-Derived Red Blood Cells and Platelet Concentrates: From Bench to Bedside
Source: PubMed Central journal article supplement (PMC5789275; doi:10.3390/cells7010002), 2017-12-27
Supplement: cells-07-00002-s001.pdf [file cells-07-00002-s001.pdf]

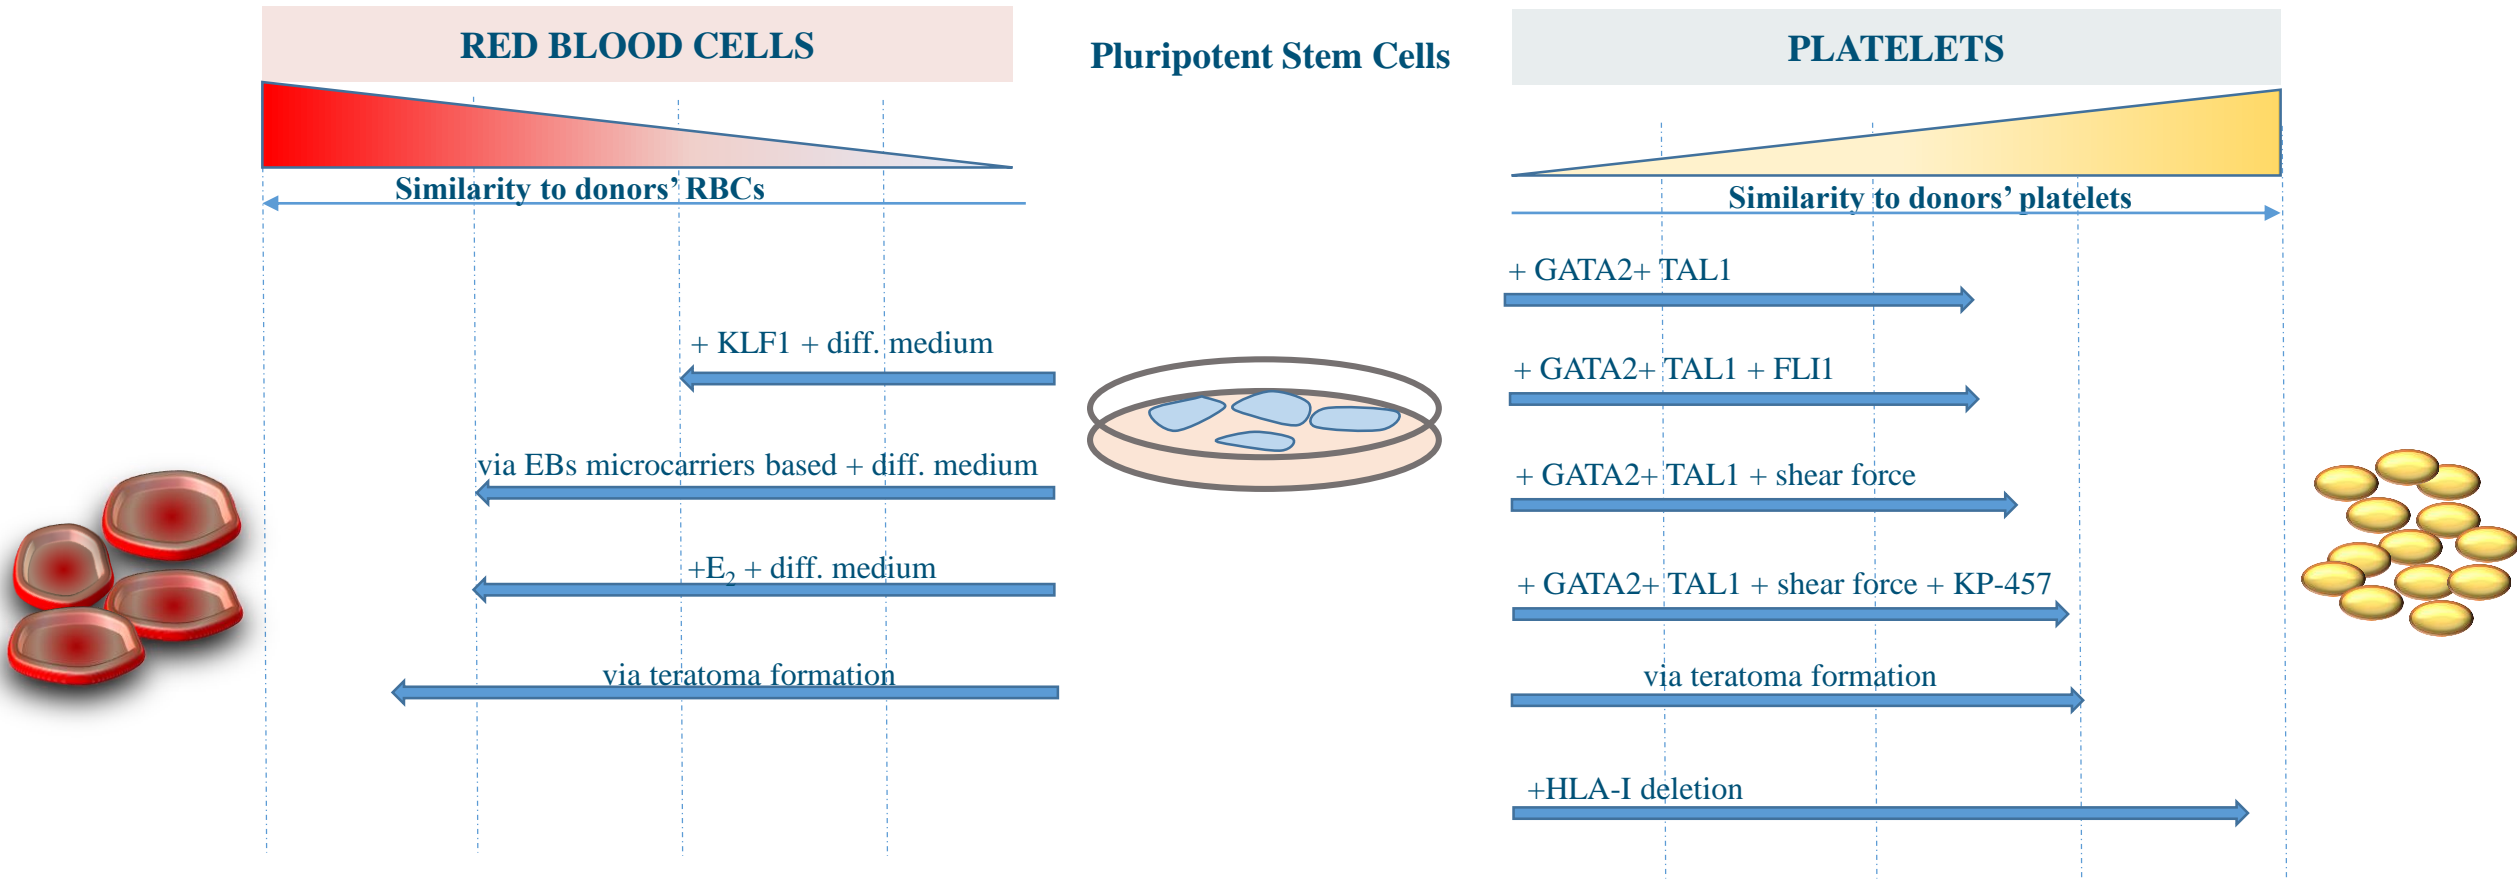

Figure 1. Focosi D. and Amabile G.
